# Supplementary material for: Spatial Surface Charge Engineering for Electrochemical Electrodes
Source: PubMed Central journal article supplement (PMC6787049; doi:10.1038/s41598-019-51048-5), 2019-10-10
Supplement: 41598_2019_51048_MOESM1_ESM.pdf [file 41598_2019_51048_MOESM1_ESM.pdf]

## **Supplementary information**

### **Spatial surface charge engineering for electrochemical electrodes**

Lingyun Xie<sup>1</sup>, Peng Wang<sup>1</sup>, Yiping Qian<sup>1</sup>, Lujia Rao<sup>1</sup>, Hongjie Yin<sup>1</sup>, Xingyu Wang<sup>1</sup>, Hedong Chen<sup>1</sup>,  
Guofu Zhou<sup>1,2,3</sup> & Richard Nötzel<sup>1,2</sup>

<sup>1</sup>*Guangdong Provincial Key Laboratory of Optical Information Materials and Technology, South China Academy of Advanced Optoelectronics, South China Normal University, Guangzhou 510006, P. R. China.*

<sup>2</sup>*National Center for International Research on Green Optoelectronics, South China Normal University, Guangzhou 510006, P. R. China.*

<sup>3</sup>*Academy of Shenzhen Guohua Optoelectronics, Shenzhen 518110, P. R. China*

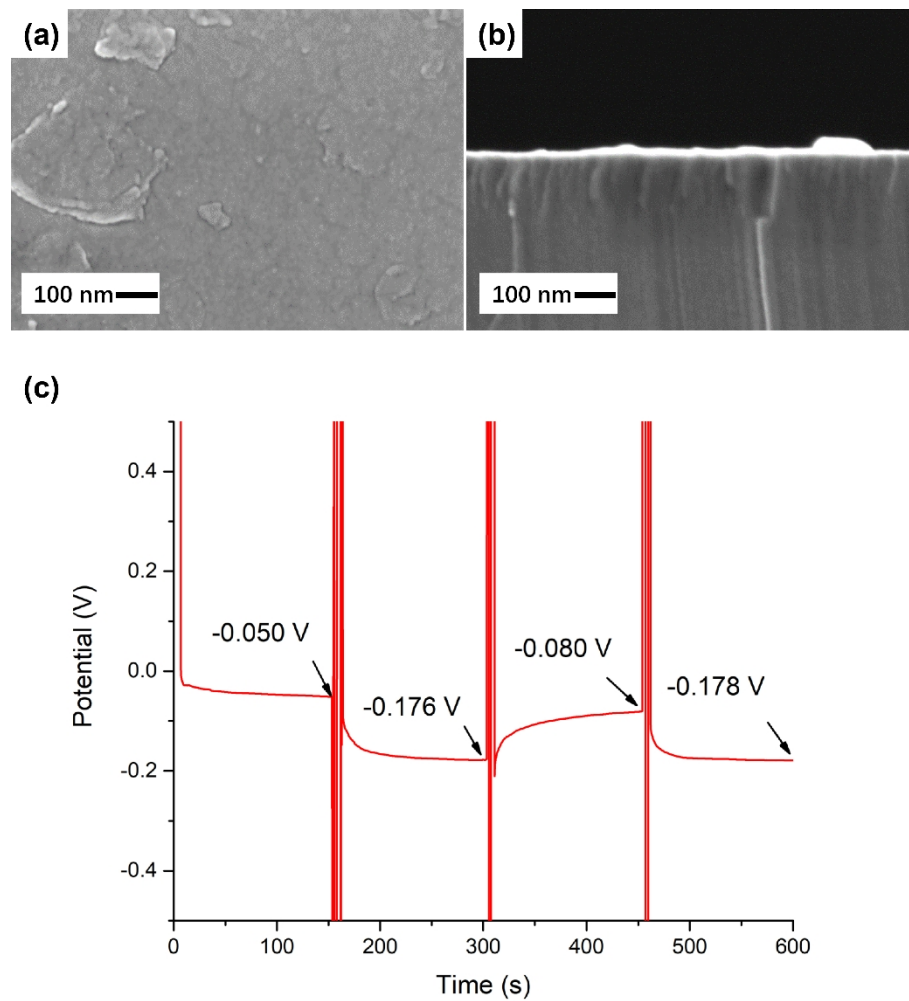

Figure S1. InN/InGaN structure on GaN/sapphire at the critical thickness of quantum dot formation and open circuit potential. (a) Top-view and (b) cross-sectional SEM images of the 0.8-ML-InN/130-nm-In<sub>0.45</sub>Ga<sub>0.55</sub>N sample grown on a GaN/sapphire substrate. Onset of QD formation is observed. (c) OCP as a function of time for the InN/InGaN electrode and Ag/AgCl reference electrode immersed alternately for 150 seconds in 0.1 and 1 M KCl aqueous solutions.

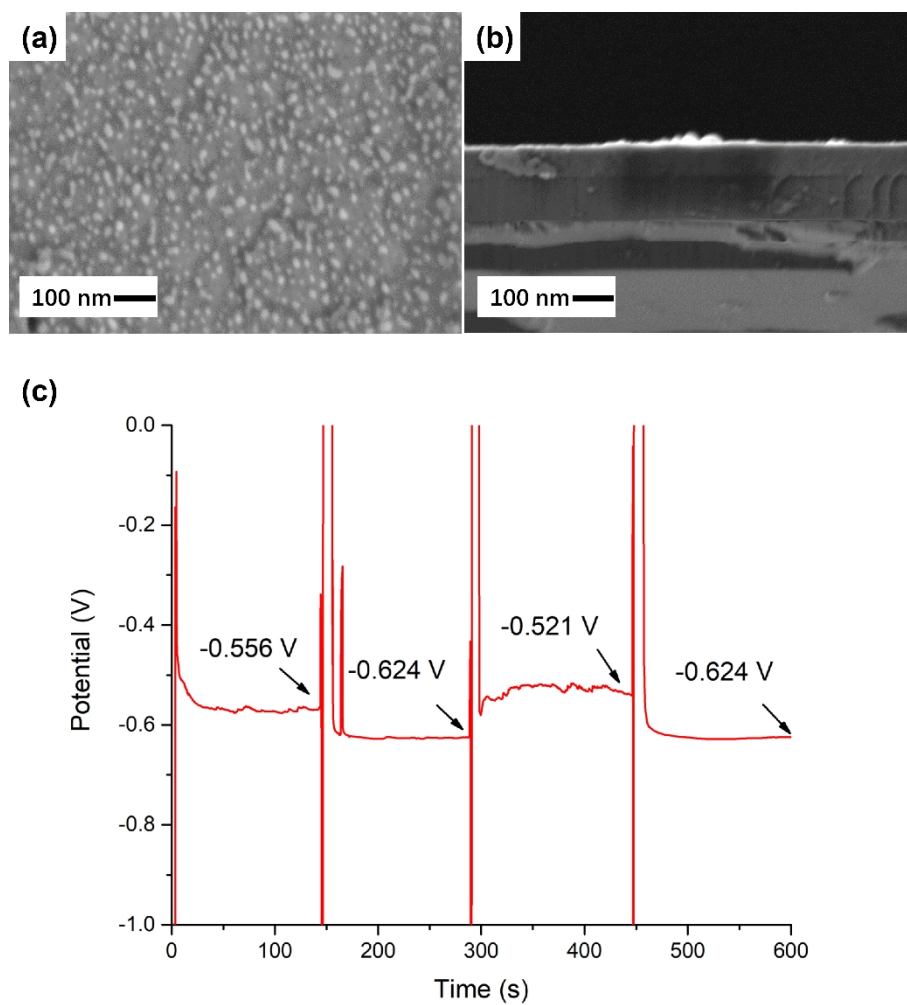

Figure S2. InN/InGaN structure on GaN/sapphire with clear quantum dot formation and open circuit potential. (a) Top-view and (b) cross-sectional SEM images of the 1.2-ML-InN/130-nm- $\text{In}_{0.45}\text{Ga}_{0.55}\text{N}$  sample grown on a GaN/sapphire substrate. Clear QD formation is observed. (c) OCP as a function of time for the InN/InGaN electrode and Ag/AgCl reference electrode immersed alternately for 150 seconds in 0.1 and 1 M KCl aqueous solutions.

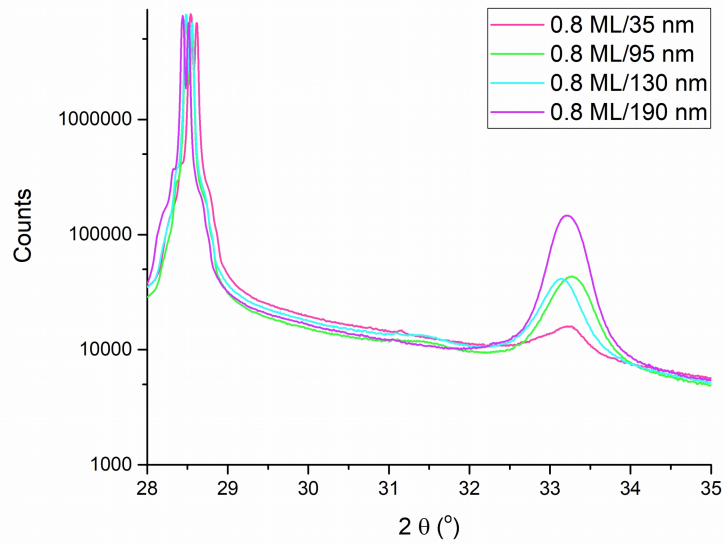

Figure S3. XRD spectra recorded around the symmetric Si (111) Bragg reflection of samples: 0.8-ML-InN/35-nm-InGaN (red line), 0.8-ML-InN/95-nm-InGaN (green line), 0.8-ML-InN/130-nm-InGaN (blue line), and 0.8-ML-InN/190-nm-InGaN (violet line).

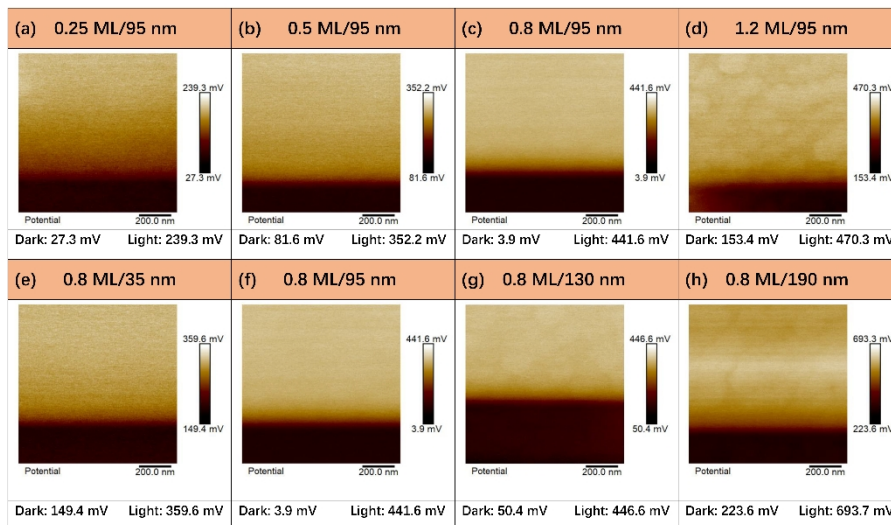

Figure S4. KPFM images and relative surface potentials of samples (a) 0.25-ML-InN/95-nm-InGaN, (b) 0.5-ML-InN/95-nm-InGaN, (c) 0.8-ML-InN/95-nm-InGaN, (d) 1.2-ML-InN/95-nm-InGaN, (e) 0.8-ML-InN/35-nm-InGaN, (f) 0.8-ML-InN/95-nm-InGaN, (g) 0.8-ML-InN/130-nm-InGaN, and (h) 0.8-ML-InN/190-nm-InGaN.

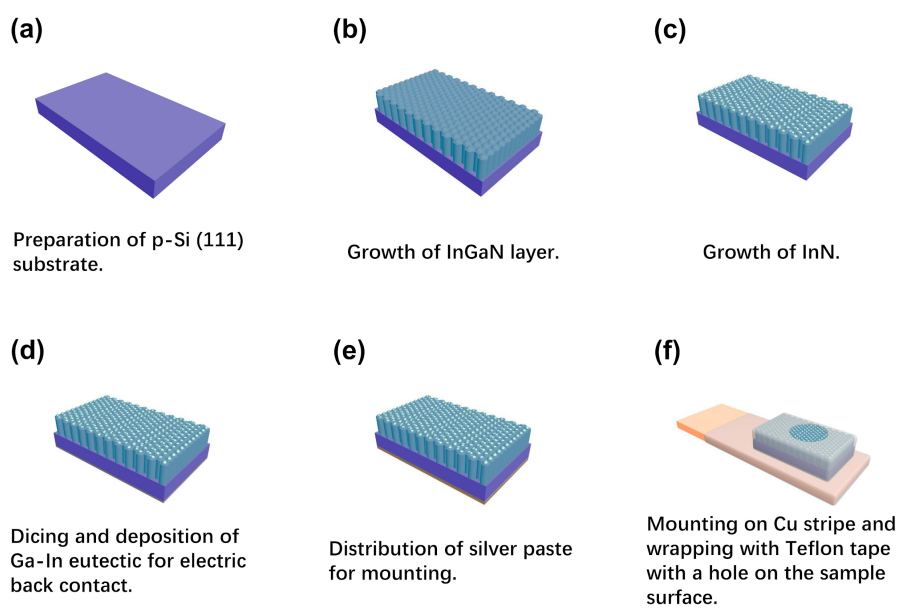

Figure S5. Schematic drawings of the (a-c) growth process and (d-f) electrode fabrication.

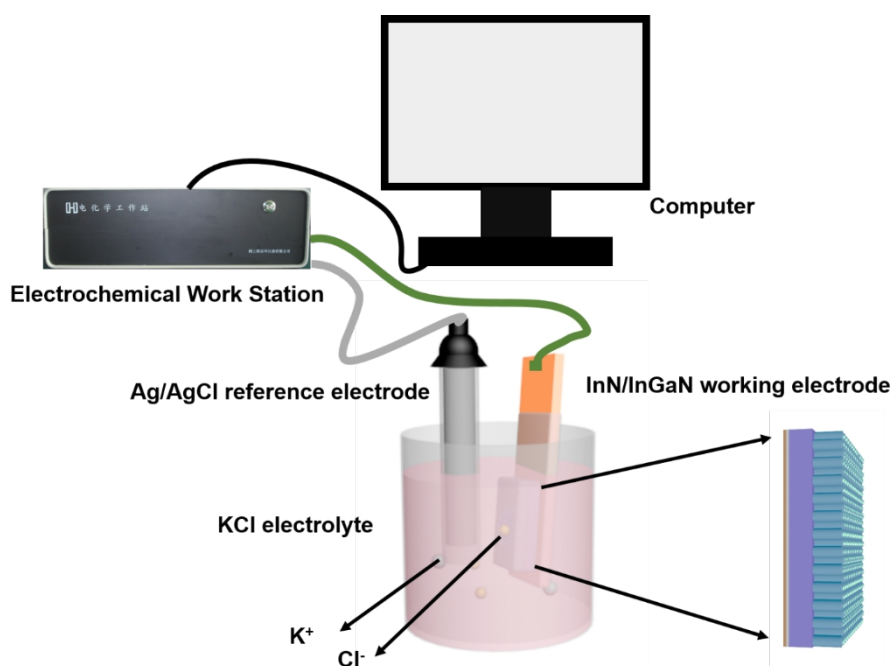

Figure S6. Schematic drawing of the measurement setup.
